# Supplementary material
Source: Royal Society of Chemistry journal article supplement (doi:10.1039/d6tb00050a)
Supplement: d6tb00050a1.pdf [file d6tb00050a1.pdf]

### Supporting Information

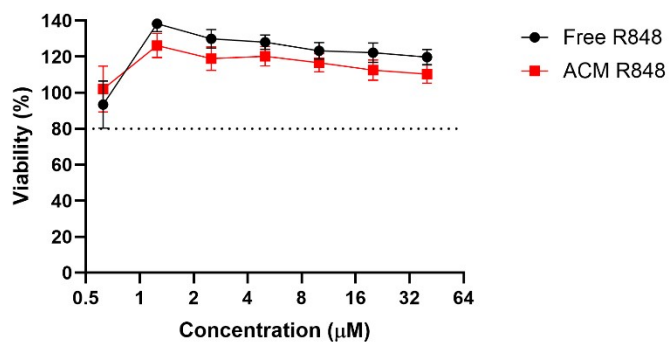

**Figure S1.** *In vitro* cytotoxicity of R848 and ACM-R848 in PBMC after 24 h incubation at 37°C.

**Table S1.** Physicochemical properties of the TLR7/8 agonists

| TLR7/8 agonists | M <sub>w</sub> | Structure                                                                            | Log P             |
|-----------------|----------------|--------------------------------------------------------------------------------------|-------------------|
| R848            | 314.38         | 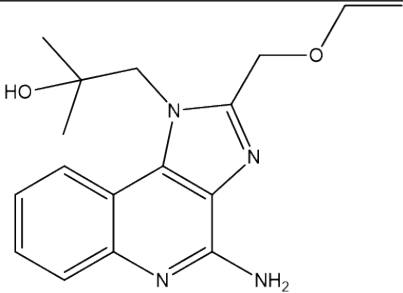   | 1.72 <sup>1</sup> |
| 3M-060          | 455.00         |   | 6.43*             |
| 3M-060A         | 405.5          |  | NA                |

- The Log P value of 3M-060 is a calculated value (cLogP) determined using ACD/ChemSketch software
- NA indicates not available

**Table S2.** *In vitro* immunogenicity properties of the 3M-060 in HEK293 cells expressing either TLR7 or TLR8<sup>2</sup>

| Cytokine | HEK293 cells minimum effective concentration (MEC) ( $\mu\text{M}$ ) |                 |
|----------|----------------------------------------------------------------------|-----------------|
|          | Expressing TLR7                                                      | Expressing TLR8 |
| IL-8     | $\leq 0.01$                                                          | 3.3             |

**Table S3.** *In vitro* immunogenicity properties of the TLR7/8 agonists in PBMCs

| TLR7/8 agonists | Human PBMCs minimum effective concentration (MEC) ( $\mu\text{M}$ ) |               |
|-----------------|---------------------------------------------------------------------|---------------|
|                 | TNF- $\alpha$                                                       | IFN- $\gamma$ |
| R848            | 0.37                                                                | 1.1           |
| 3M-060          | $\leq 0.01$                                                         | $\leq 0.01$   |

**Table S4.** Physicochemical properties of the empty polymersomes

|                    | PBD-PEO/DOTAP conc. (mM) | Z average (nm)  | PDI  | Zeta potential (mV) | Endotoxin level (EU/mL) * |
|--------------------|--------------------------|-----------------|------|---------------------|---------------------------|
| Empty polymersomes | 10                       | 134.4 $\pm$ 4.5 | 0.16 | 29.6 $\pm$ 0.6      | 0.2**                     |

\*: Endotoxin level corresponds to empty polymersomes formulation stock solution.

\*\* empty polymersomes was prepared under strict endotoxin-controlled conditions.

**Table S5.** Primers for qPCR

| Entries | Gene  | Forward primer          | Reverse primer          |
|---------|-------|-------------------------|-------------------------|
| 1       | CD8a  | CCGTTGACCCGCTTTCTGT     | TTCGGCGTCCATTTTCTTTGG   |
| 2       | CD4   | AGGTGATGGGACCTACCTCTC   | GGGGCCACCACTTGAACTAC    |
| 3       | FoxP3 | CACCTATGCCACCCTTATCCG   | CATGCGAGTAAACCAATGGTAGA |
| 4       | GZMB  | CCACTCTCGACCCTACATGG    | GGCCCCAAAGTGACATTTATT   |
| 5       | IFNG  | GCCACGGCACAGTCATTGA     | TGCTGATGGCCTGATTGTCTT   |
| 6       | IL10  | AGCCTTATCGGAAATGATCCAGT | GGCCTTGTAGACACCTTGGT    |
| 7       | TNFa  | CCTGTAGCCACGTCGTAG      | GGGAGTAGACAAGGTACAACCC  |
| 8       | TGFB1 | CTTCAATACGTCAGACATTCGGG | GTAACGCCAGGAATTGTTGCTA  |
| 9       | PD-1  | ACCCTGGTCATTCACTTGGG    | CATTGCTCCCTCTGACTG      |
| 10      | LAG3  | CTGGGACTGCTTTGGGAAG     | GGTTGATGTTGCCAGATAACCC  |
| 11      | FasL  | TGGGTAGACAGCAGTGCCAC    | GCCCACAAGATGGACAGGG     |
| 12      | IL12A | CAATCACGCTACCTCCTCTTTT  | CAGCAGTGCAGGAATAATGTTTC |
| 13      | IL12B | GTCCTCAGAAGCTAACCATCTCC | CCAGAGCCTATGACTCCATGTC  |
| 14      | IL6   | CTGCAAGAGACTTCCATCCAG   | AGTGGTATAGACAGGTCTGTTGG |
| 15      | IRF7  | GAGACTGGCTATTGGGGGAG    | GACCGAAATGCTTCCAGGG     |
| 16      | IFNA1 | TAATTCCTACGTCTTTTCTTT   | TATGCCTGATCCCTGAACAGT   |
| 17      | GAPDH | GGTCATCCATGACAACTTTGG   | GGATGCAGGGATGATGTTCT    |

## References

1. R. Fu, D. Meng, X. Han, L. Liu, C. Chen, R. Zheng, Y. Zhao, X. Zhang, X. Lin, M. Hasani, Y. Song, T. Liang, D. Wen, H. Li, I. Yavuz, H. Feng, Z. Gu, Z. Li, S. Li, F. Liu and Y. Yang, *Sci Adv*, 2025, **11**, eadp2757.
2. D. Smirnov, J. J. Schmidt, J. T. Capecchi and P. D. Wightman, *Vaccine*, 2011, **29**, 5434-5442.
